# Supplementary material
Source: PubMed Central journal article supplement (PMC10586516)
Supplement: NIHMS1932834-supplement-Supplementary_Material.pdf [file NIHMS1932834-supplement-Supplementary_Material.pdf]

## Supplementary Figure legends

**Supplementary Figure 1 - (A)** Schematic of the main pathway of DNA demethylation. TET enzymes (TET1-3) progressively oxidize 5mC to 5hmC, 5fC, and 5caC. TDG excises 5fC and 5caC, and downstream BER enzymes yield cytosine. DNMTs convert cytosine into 5mC. **(B)** Schematic of the mating strategy employed to generate mice with the four genotypes of interest.

**Supplementary Figure 2 - *Tet1* and *Tdg* inactivation modifies tumor multiplicity or size in the *Apc*<sup>Min</sup> background.** Graphical representation of the total number **(A)** and size distribution **(B)** of small intestinal (left panels) and colonic (right panels) adenomas in *Tet1*<sup>-/-</sup>*Tdg*<sup>+/+</sup> (*Tet1* knockout) *Apc*<sup>Min/+</sup> mice; *Tet1*<sup>+/-</sup>*Tdg*<sup>N151A/+</sup> (double heterozygotes) *Apc*<sup>Min/+</sup> mice; *Tet1*<sup>+/+</sup>*Tdg*<sup>N151A/+</sup> (*Tdg* heterozygotes) *Apc*<sup>Min/+</sup> mice, and control *Tet1*<sup>+/+</sup>*Tdg*<sup>+/+</sup> (“wild type”) *Apc*<sup>Min/+</sup> mice. \* *P*-value < .05, \*\* *P*-value < .01.

**Supplementary Figure 3 - Immunohistochemistry of adenomas of different genotypes stained with anti-F4/80 antibody **(A)** or anti-CD3 antibody **(B)**;** the scale bar is 100 microns. **(C)** Deconvolution of differential gene expression between control *Apc*<sup>Min/+</sup> adenomas and *Tet1* and *Tdg* mutant adenomas (see Fig. 4) using GEDIT (<https://webtools.mcdb.ucla.edu/>) confirms the prevalent involvement of myelomonocytic and T-cell lineages.

**Supplementary Figure 4 - (A)** Pie chart showing the percentage of hypermethylation and hypomethylation at CpG sites by genomic feature/location (promoter, exonic, intronic and intergenic) for comparison between *Tet1*<sup>-/-</sup>*Tdg*<sup>+/+</sup> (*Tet1* knockout) *Apc*<sup>Min/+</sup> adenomas, *Tet1*<sup>+/-</sup>*Tdg*<sup>N151A/+</sup> (double heterozygous) *Apc*<sup>Min/+</sup> adenomas, *Tet1*<sup>+/+</sup>*Tdg*<sup>N151A/+</sup> (*Tdg* heterozygous) *Apc*<sup>Min/+</sup> adenomas vs. control *Tet1*<sup>+/+</sup>*Tdg*<sup>+/+</sup> (“wild type”) *Apc*<sup>Min/+</sup> adenomas. **(B)** Examples of DNA methylation level validation by bisulfite sequencing of a CGI (*Semaf5b*) and a NCGI (*Calb2*) locus differentially methylated between *Tet1*<sup>-/-</sup>*Tdg*<sup>+/+</sup> (*Tet1* knockout) *Apc*<sup>Min/+</sup> colonic adenomas and *Tet1*<sup>+/+</sup>*Tdg*<sup>+/+</sup> (“wild type”) *Apc*<sup>Min/+</sup>

colonic adenomas. (C) Representative electropherograms of analysis of microsatellite instability in adenomas of the indicated genotypes, conducted for murine microsatellites A27, A33, D14MIT15, D17M123, D1MIT36. Normal colonic mucosae from C57BL/6J mice and Apc-Min mice were the reference.

**Supplementary Figure 5 - (A)** cBioPortal Oncoprint showing alterations of *TET1-3* and *TDG* in various CRC data sets. Each column denotes an individual tumor and each row represents a gene. The total frequency of alterations per gene is noted on the left. Colors and symbols refer to type of genomic alteration and study of origin, as indicated. **(B)** cBioPortal Oncoprint showing alterations and mRNA expression changes of *TET1-3* and *TDG* levels in TCGA COAD and READ data sets. Each column denotes an individual tumor and each row represents a gene. The total frequency of alterations and changes in expression levels is noted on the left. Colors and symbols refer to type of genomic alteration or change in expression and study of origin, as indicated.

**Supplementary Figure 6 - (A)** Expression levels of *TET1-3* and *TDG* mRNA (z-score relative to all samples, log RNA Seq V2 RSEM) in CRC samples in TCGA COAD (n=439) and READ (n=155) data sets. **(B)** *TET1* expression by lower/upper quartile of *TDG* expression, and **(C)** *TDG* expression by lower/upper quartile of *TET1* expression in TCGA COAD and READ data sets, showing that lower *TET1* expression corresponds to lower *TDG* levels and vice versa, as indicated.

**Supplementary Figure 7 -** Cluster analysis of TCGA COAD (colon adenocarcinoma) cases with the 127-gene human *TET1*/*TDG*-related inflammatory signature, as in Fig. 6A, to mark clusters C1-C4 **(A)**, with the signature unique to Te1-Te1-Am adenomas which identified the MSI/CIMP cases (yellow) **(B)**, with the signature unique to Te1-Td-Am (double het) adenomas **(C)**, and with the signature unique to Td-Am adenomas **(D)**.

**Supplementary Figure 8** - Cluster analysis of TCGA COAD (colon adenocarcinoma) cases with a 44-gene signature derived from the 127-gene inflammation set by linear discriminant analysis (LDA) followed by a leave-one-out cross validation; clusters C1-C4 are identified with a success rate of approximately 75%.

**Supplementary Figure 9** - (A) Hypoxia score and (B) Female/Male ratio in TCGA COAD (colon adenocarcinoma) cases in clusters CIN-*cold* (C2) and CIN-*hot* (C4).

A

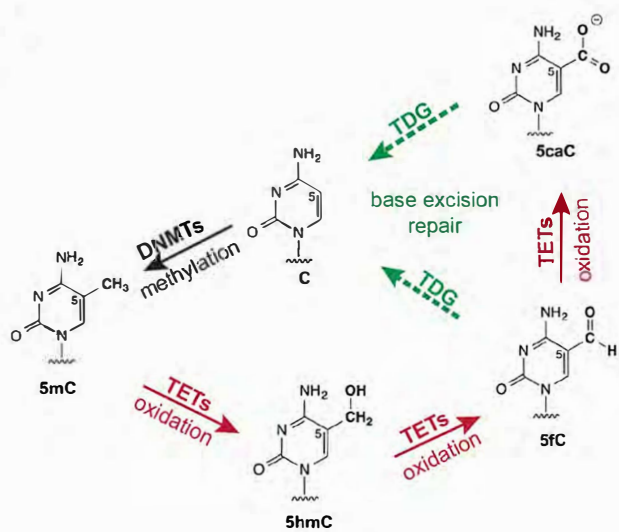

B

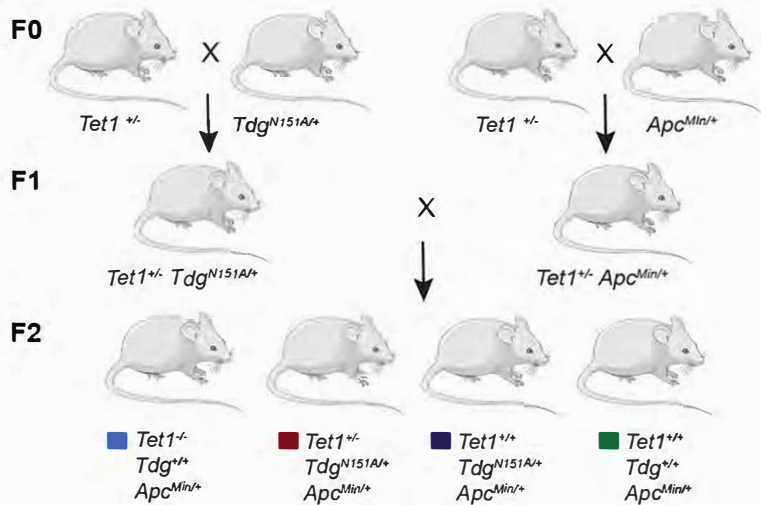

Suppl. Figure 1

# A Adenoma number distribution

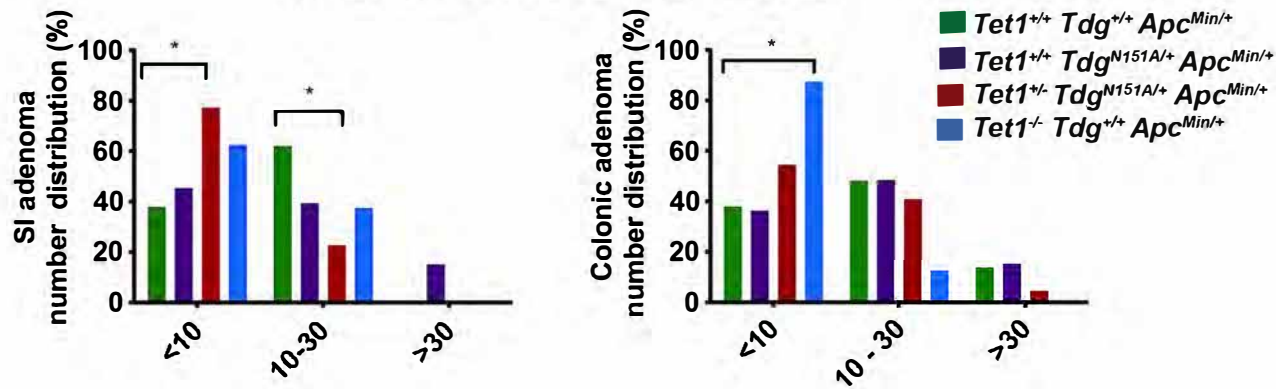

# B Adenoma size distribution

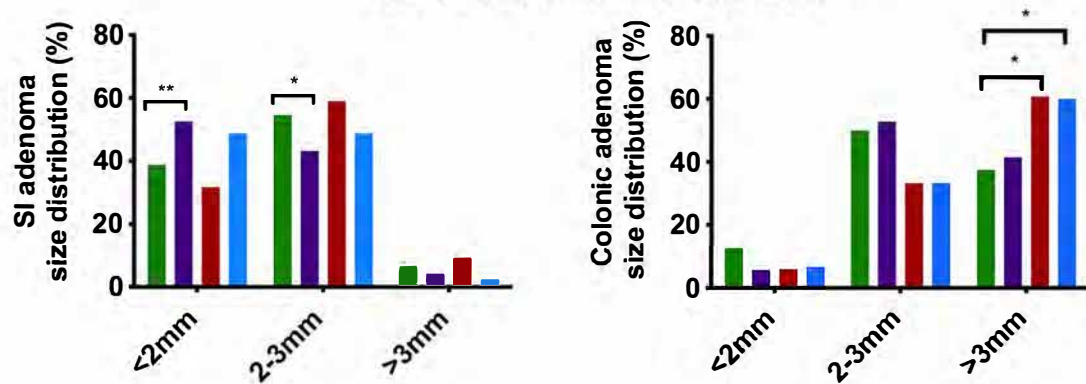

**A**

Anti-F4/80 immunohistochemistry

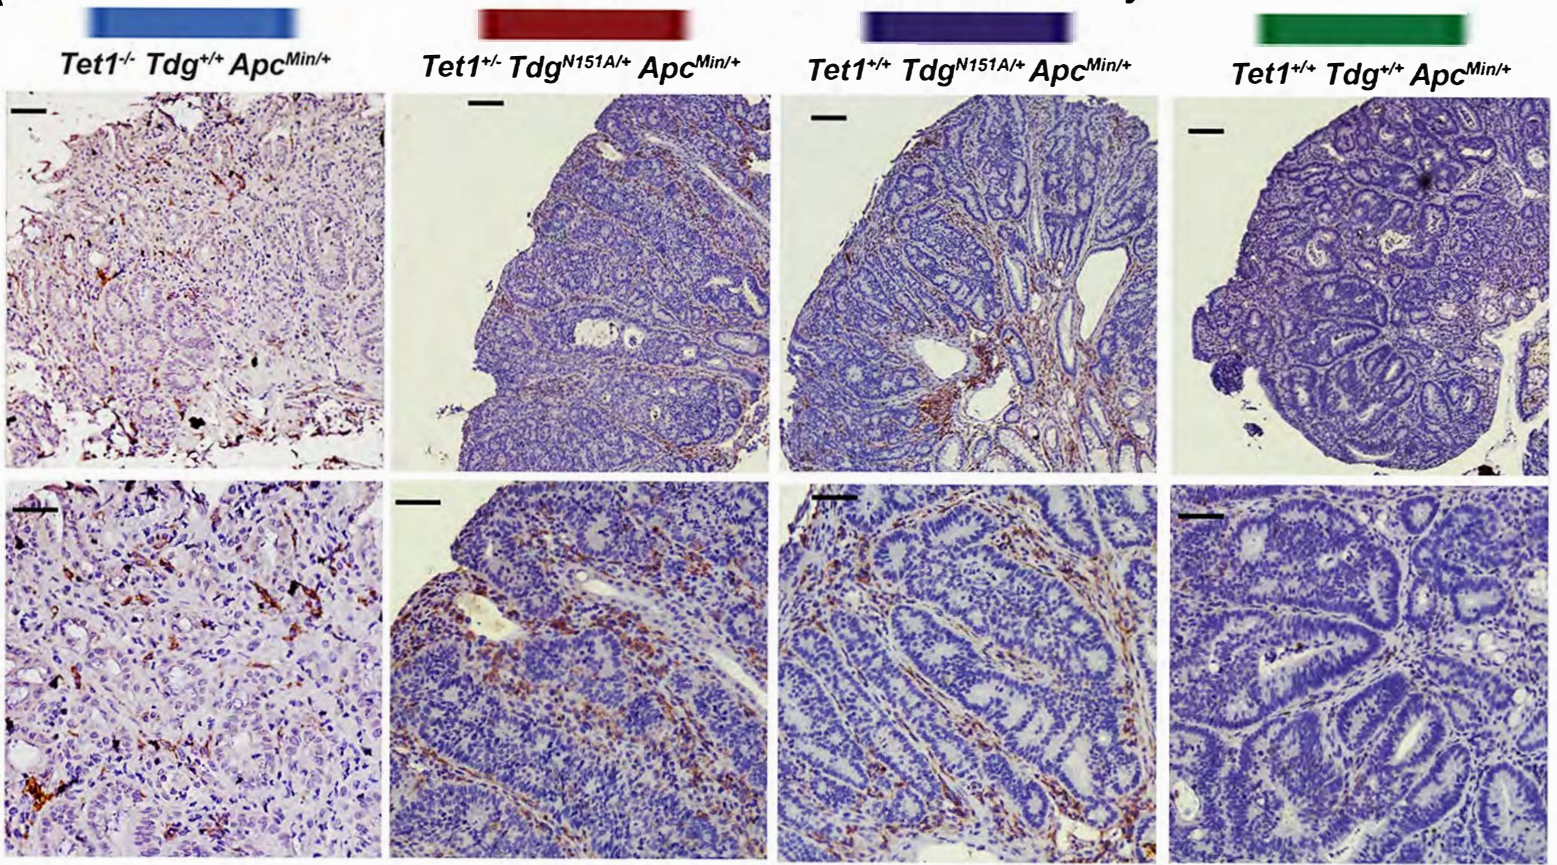

**B**

Anti-CD3 immunohistochemistry

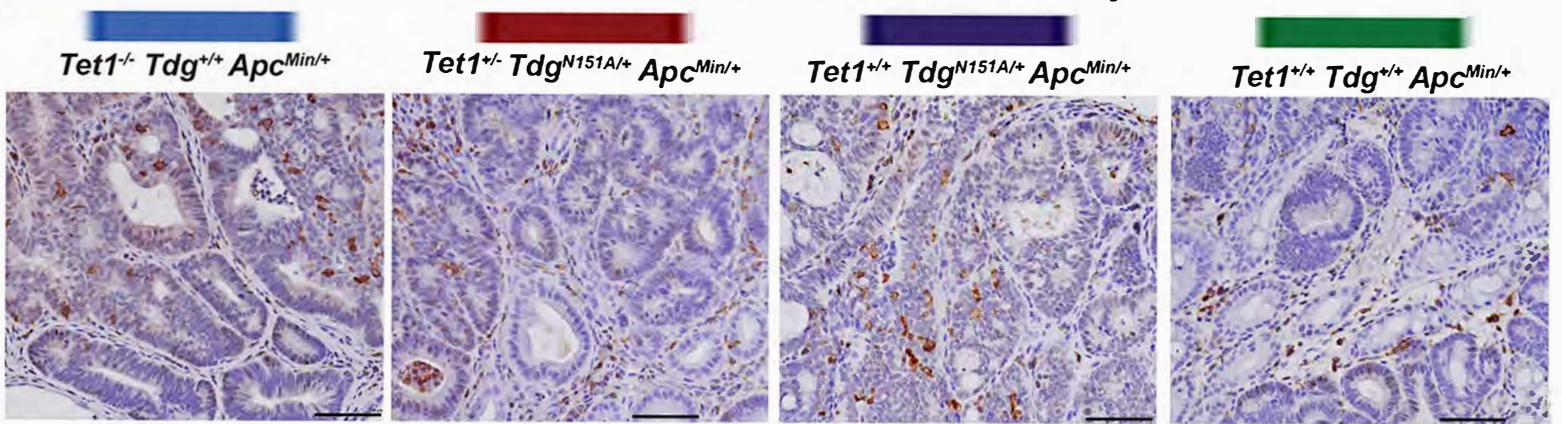

**C**

Deconvolution of immune cells

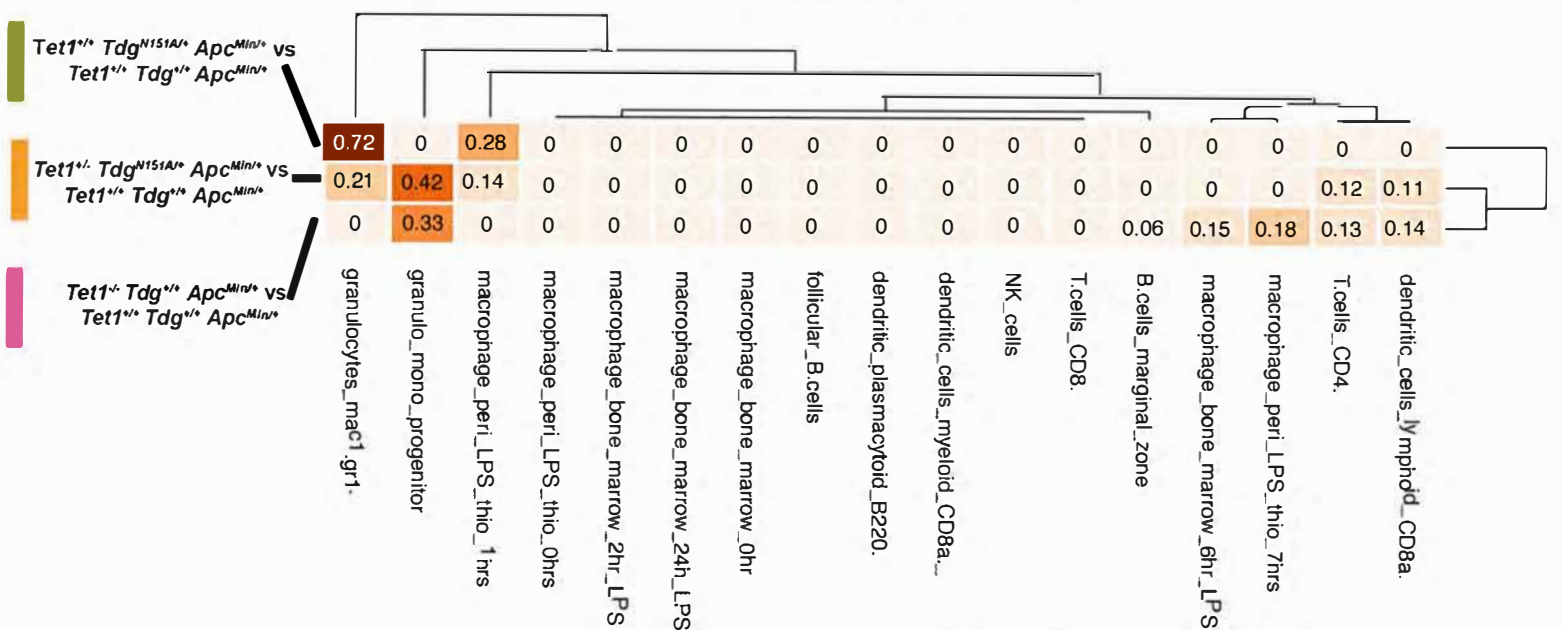

**A**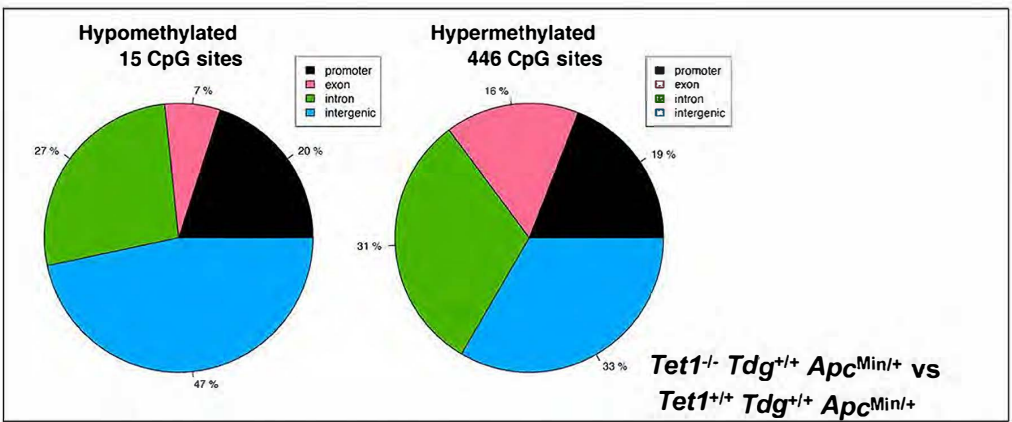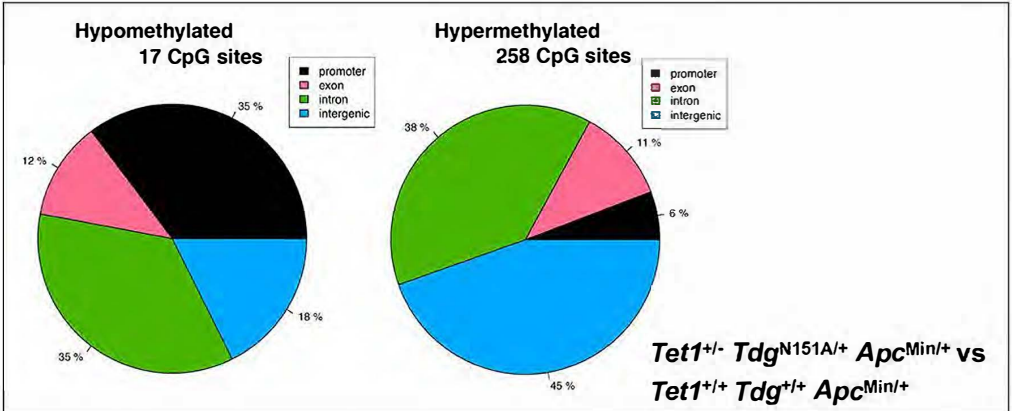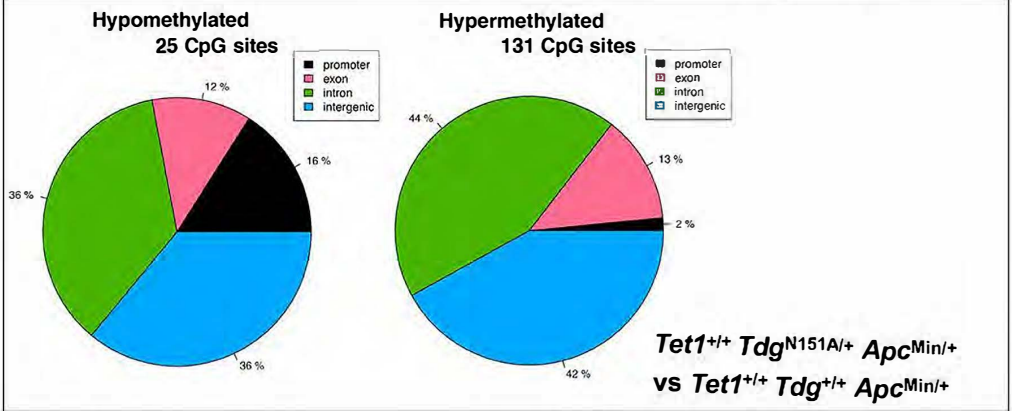**B**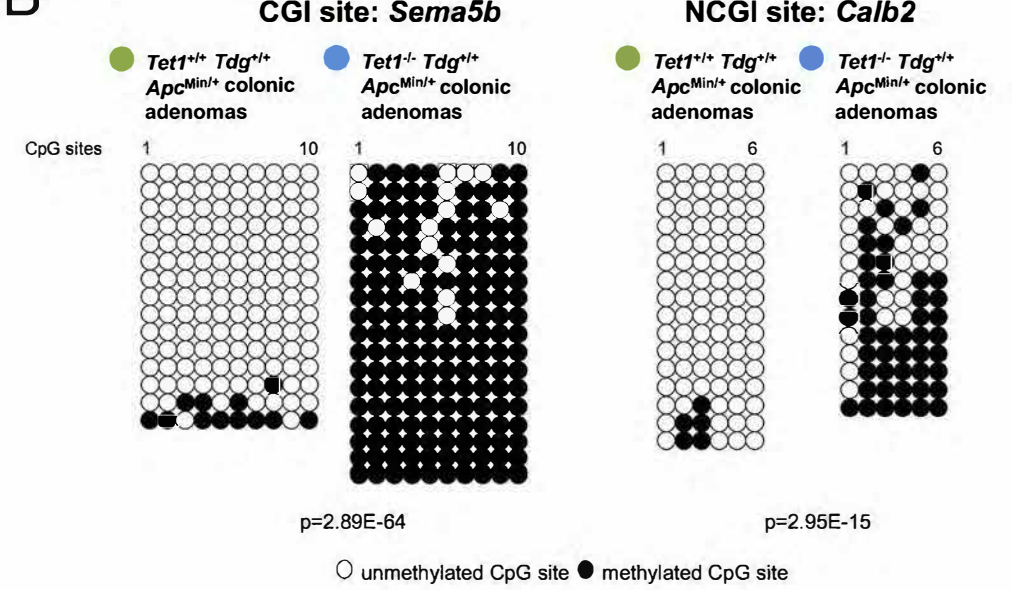**C**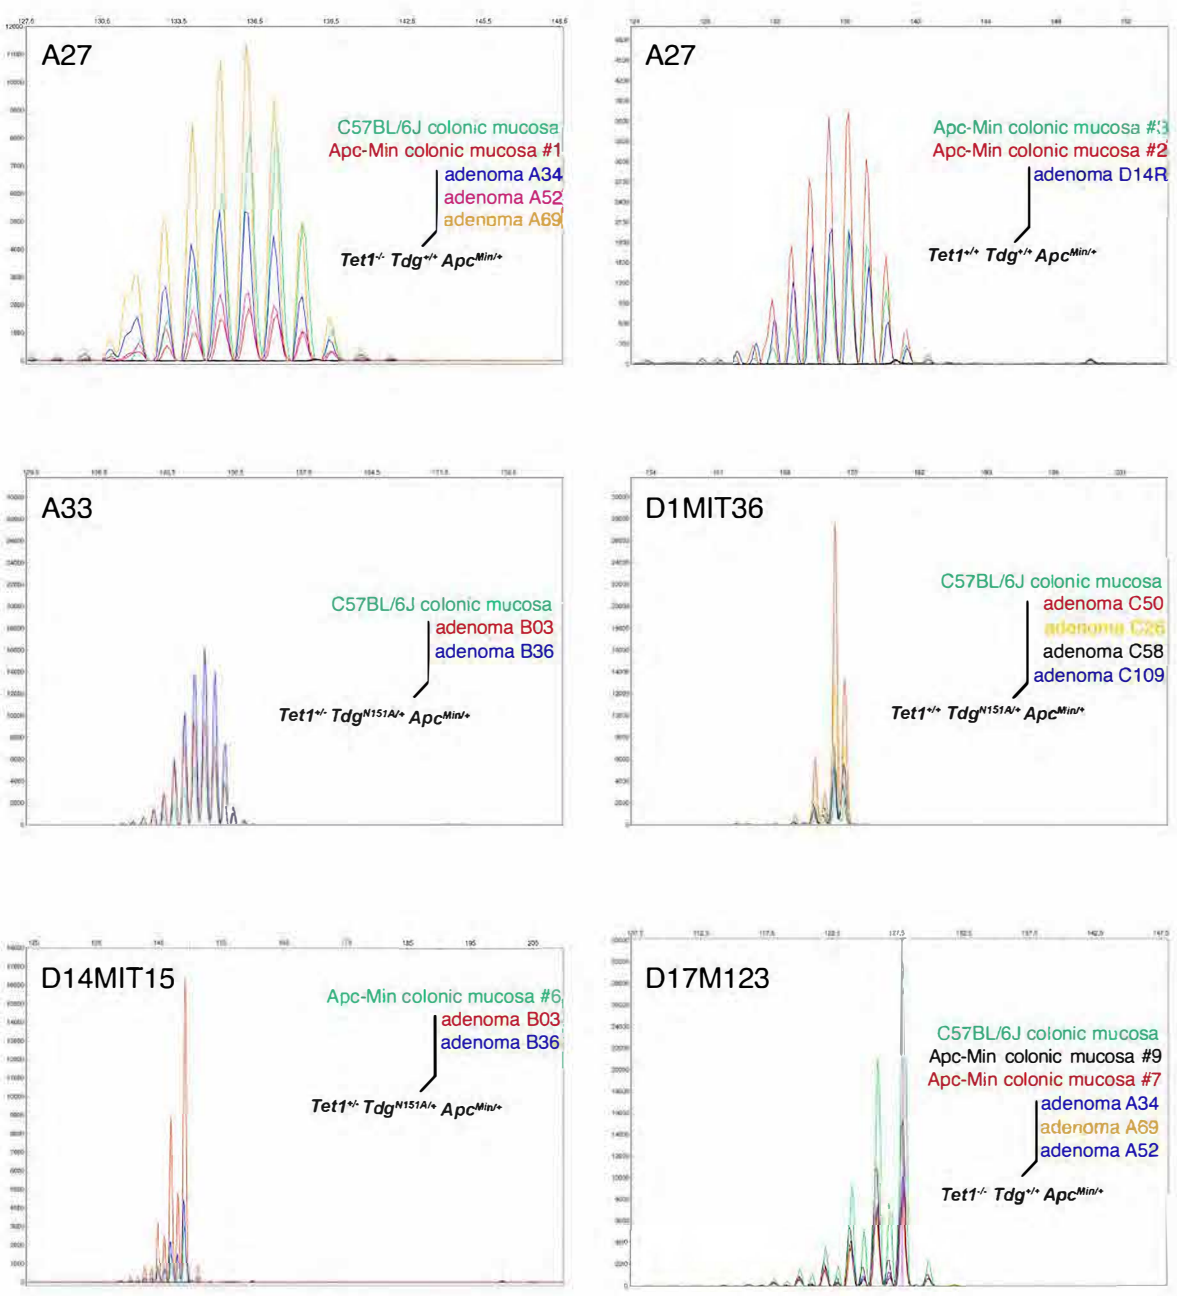

A

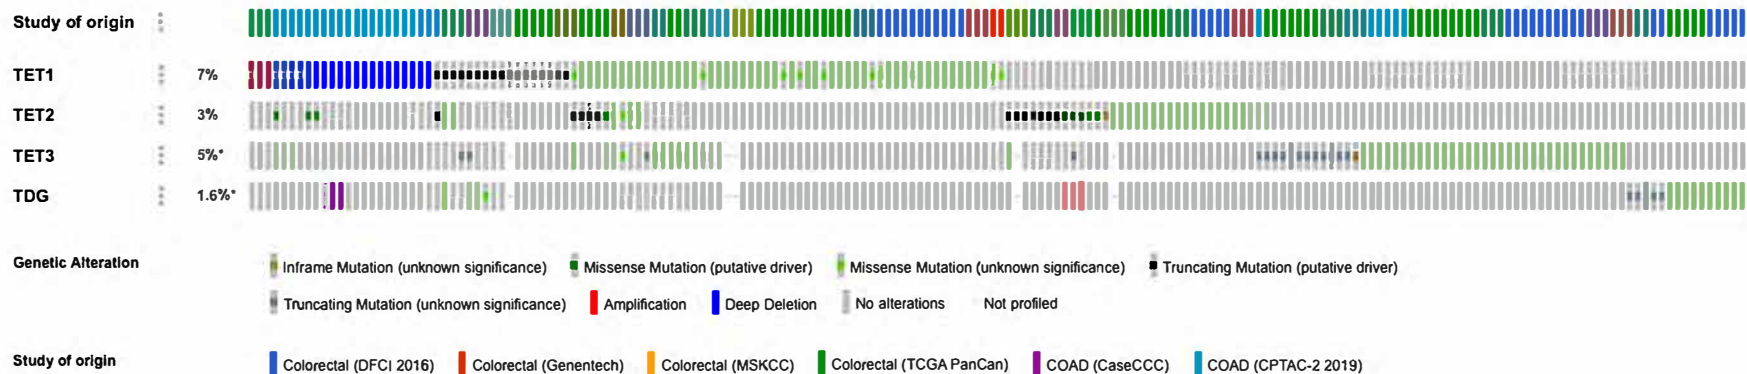

B

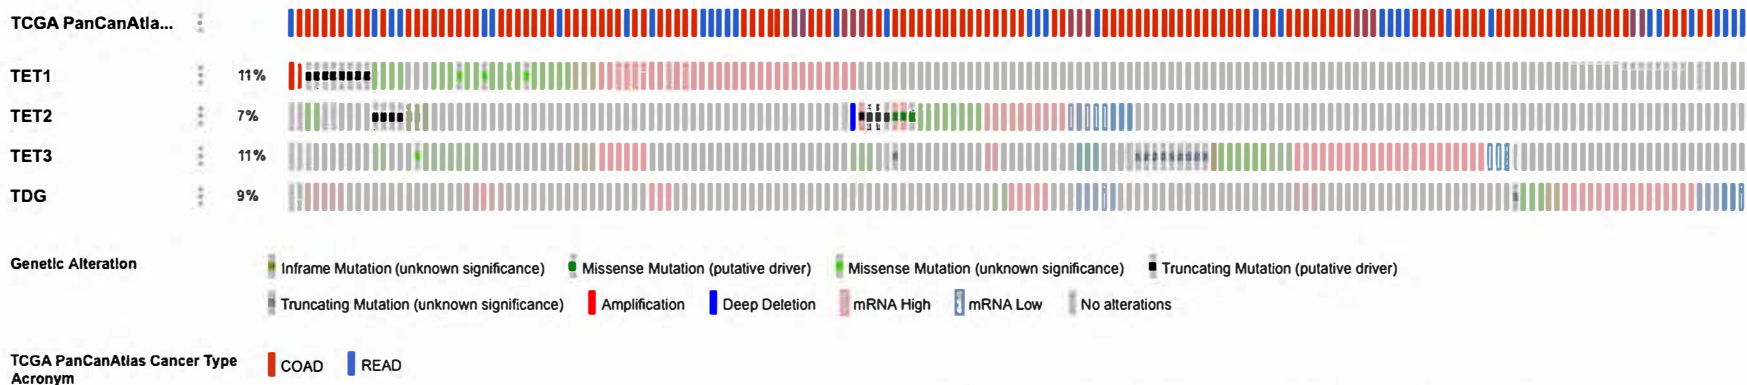

Suppl. Figure 5



**A***TET1*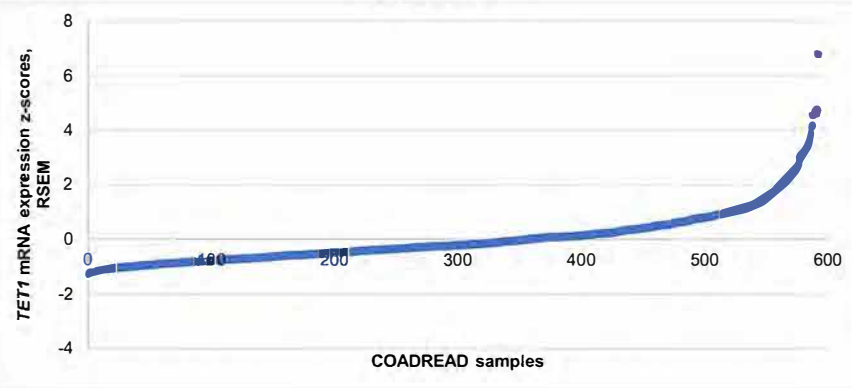*TET2*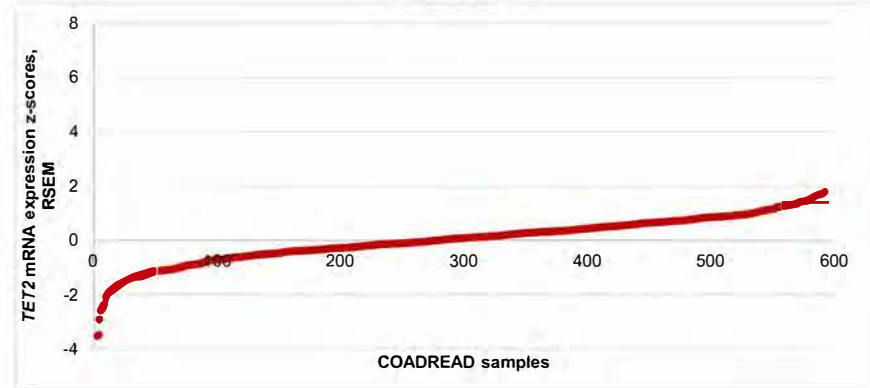*TET3*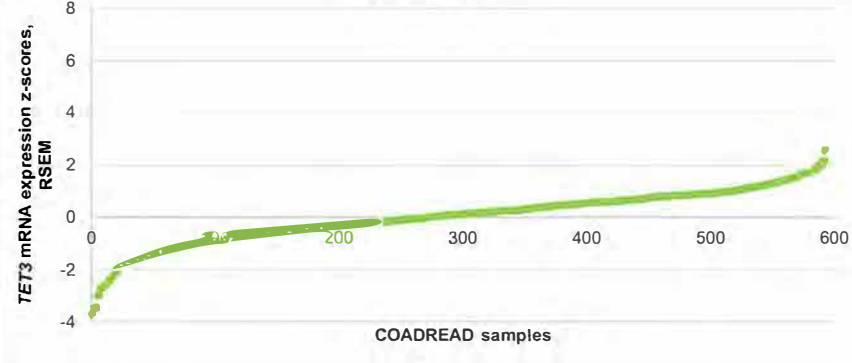*TDG*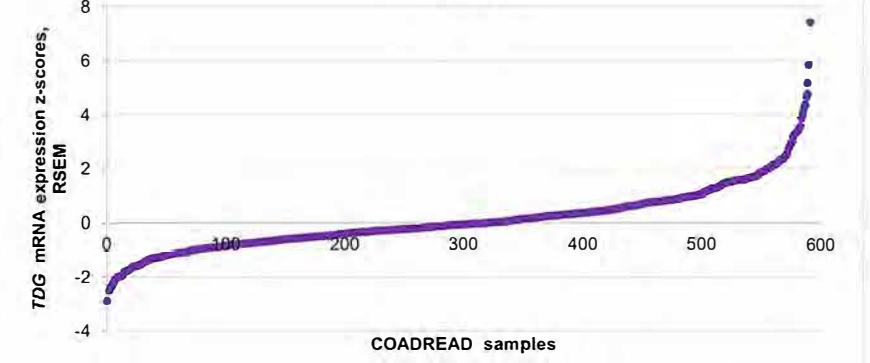**B**

TET1.Expr by upper/lower quartile of TDG expression

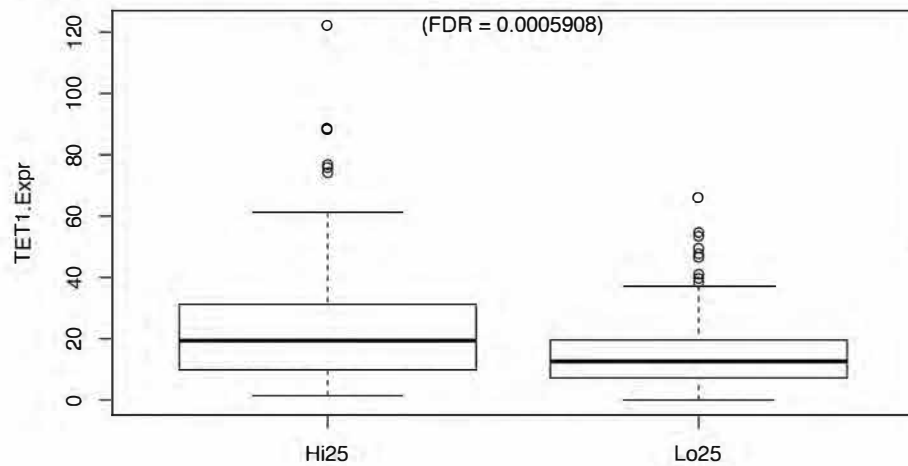**C**

TDG.Expr by upper/lower quartile of TET1 expression

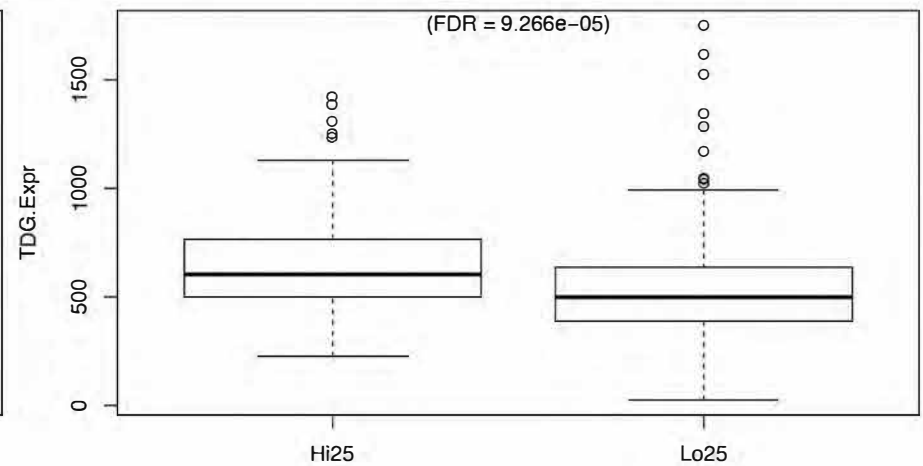

Suppl. Figure 6





**A**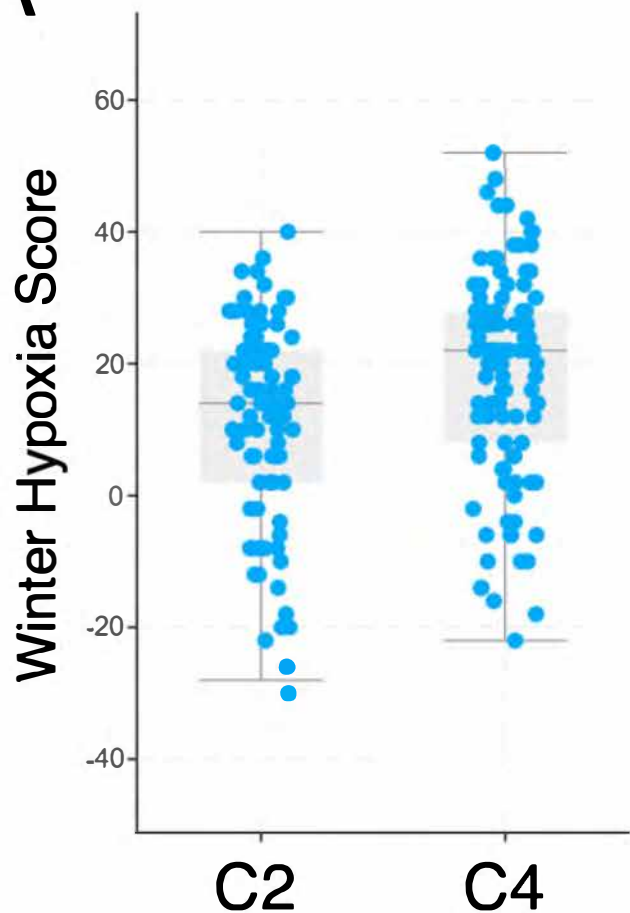**B**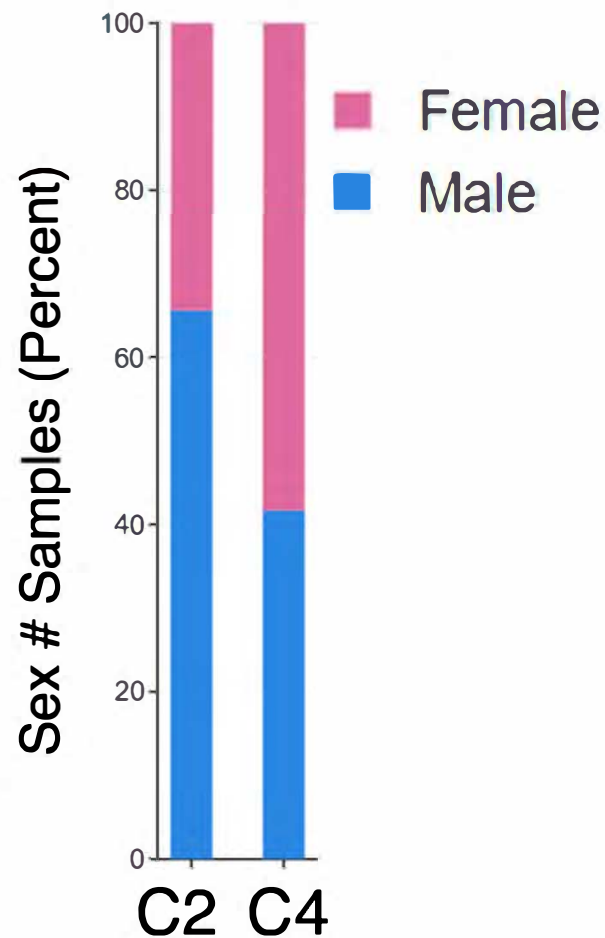

|                      | Statistical Test | p-Value  | q-Value |
|----------------------|------------------|----------|---------|
| Winter Hypoxia Score | Wilcoxon Test    | 9.615e-4 | 0.0345  |
| Sex                  | Chi-squared Test | 1.522e-3 | 0.0345  |

**Supplemental Table 1 – WGEM-seq sequencing parameters**

| Colonic adenoma genotype                                          | Total number of reads | Depth (-fold) | Percent CpG sites in mm10 covered | 5x CpG coverage threshold | 10x CpG coverage threshold |
|-------------------------------------------------------------------|-----------------------|---------------|-----------------------------------|---------------------------|----------------------------|
| <i>Tet1<sup>-/-</sup>Tdg<sup>+/+</sup>Apc<sup>Min/+</sup></i>     | 187,065,022           | 8x            | 80.63%                            | 11,826,719                | 1,331,939                  |
| <i>Tet1<sup>+/-</sup>Tdg<sup>N151A/+</sup>Apc<sup>Min/+</sup></i> | 251,431,684           | 10x           | 81.70%                            | 16,757,681                | 5,830,675                  |
| <i>Tet1<sup>+/+</sup>Tdg<sup>N151A/+</sup>Apc<sup>Min/+</sup></i> | 335,808,976           | 14x           | 81.54%                            | 17,864,331                | 8,105,411                  |
| <i>Tet1<sup>+/+</sup>Tdg<sup>+/+</sup>Apc<sup>Min/+</sup></i>     | 287,077,894           | 12x           | 81.58%                            | 17,929,046                | 7,773,202                  |

**Supplementary Table 2 - 127-Genes Signature**

| Gene     | Entrez |
|----------|--------|
| MCEMP1   | 199675 |
| ACSBG1   | 23205  |
| ADAMTSL4 | 54507  |
| ADM      | 133    |
| ALDH1A3  | 220    |
| AQP8     | 343    |
| ATP12A   | 479    |
| CA1      | 759    |
| CBR3     | 874    |
| CCL3L3   | 414062 |
| CCL4     | 6351   |
| CES1     | 1066   |
| CLCA2    | 9635   |
| CLEC4D   | 338339 |
| CLEC4E   | 26253  |
| COL17A1  | 1308   |
| CSF3     | 1440   |
| CSF3R    | 1441   |
| CSRNP1   | 64651  |
| CWH43    | 80157  |
| CXCL3    | 2921   |
| CXCR2    | 3579   |
| CYP2C18  | 1562   |
| CYP4F2   | 8529   |
| DES      | 1674   |
| DHRS9    | 10170  |
| DUSP1    | 1843   |
| EPHX2    | 2053   |
| EREG     | 2069   |
| FOSB     | 2354   |
| FPR1     | 2357   |
| FPR2     | 2358   |
| G0S2     | 50486  |
| GJB4     | 127534 |
| CSTA     | 1475   |
| GSDMC    | 56169  |
| HOGA1    | 112817 |
| HP       | 3240   |
| IL11     | 3589   |
| IL1A     | 3552   |
| IL1R2    | 7850   |
| IL5RA    | 3568   |
| ITGA2    | 3673   |

|          |        |
|----------|--------|
| ITIH5    | 80760  |
| KRT13    | 3860   |
| LIX1     | 167410 |
| MMP3     | 4314   |
| MMP8     | 4317   |
| MSLN     | 10232  |
| NAT8L    | 339983 |
| NLRP3    | 114548 |
| NQO1     | 1728   |
| OR51E2   | 81285  |
| OLR1     | 4973   |
| OSM      | 5008   |
| PCDH17   | 27253  |
| PLEK     | 5341   |
| PRDM16   | 63976  |
| PRSS22   | 64063  |
| PRSS27   | 83886  |
| PTGS2    | 5743   |
| RDH12    | 145226 |
| RET      | 5979   |
| RETNLB   | 84666  |
| S100A8   | 6279   |
| S100A9   | 6280   |
| SAMSN1   | 64092  |
| SERPINA3 | 12     |
| SERPINE1 | 5054   |
| SLC4A11  | 83959  |
| SLPI     | 6590   |
| SPRR1A   | 6698   |
| SPRR2D   | 6703   |
| SRGN     | 5552   |
| SYNM     | 23336  |
| SYT8     | 90019  |
| TNIP3    | 79931  |
| TPPP3    | 51673  |
| TREM1    | 54210  |
| TRIM10   | 10107  |
| TRIM15   | 89870  |
| B2M      | 567    |
| BST2     | 684    |
| C3       | 718    |
| CPLX2    | 10814  |
| CTNND2   | 1501   |
| CXCL9    | 4283   |
| DDX60    | 55601  |

|          |        |
|----------|--------|
| DHX58    | 79132  |
| GABRP    | 2568   |
| GBP2     | 2634   |
| GBP4     | 115361 |
| GBP6     | 163351 |
| HLA-DRB5 | 3127   |
| HLA-A    | 3105   |
| HDC      | 3067   |
| HSPA1A   | 3303   |
| HSPA1B   | 3304   |
| IFI44    | 10561  |
| IFIT3    | 3437   |
| IRF7     | 3665   |
| ISG15    | 9636   |
| LARS2    | 23395  |
| LTF      | 4057   |
| CPT1B    | 1375   |
| NLRC5    | 84166  |
| NOS2     | 4843   |
| OAS1     | 4938   |
| OAS2     | 4939   |
| OAS3     | 4940   |
| OASL     | 8638   |
| PHF11    | 51131  |
| PRAP1    | 118471 |
| PSMB8    | 5696   |
| RDH16    | 8608   |
| RSAD2    | 91543  |
| RTP4     | 64108  |
| SLC38A4  | 55089  |
| SP100    | 6672   |
| SPP1     | 6696   |
| STAT1    | 6772   |
| TAP1     | 6890   |
| THBS2    | 7058   |
| USP18    | 11274  |
| XAF1     | 54739  |
| XIST     | 7503   |
| ZBP1     | 81030  |



**Supplementary Table 3 - Clusters C1 through C4**

| Patient      | Cluster |
|--------------|---------|
| TCGA-A6-5664 | C1      |
| TCGA-A6-6138 | C1      |
| TCGA-A6-6781 | C1      |
| TCGA-A6-6782 | C1      |
| TCGA-AA-3489 | C1      |
| TCGA-AD-6901 | C1      |
| TCGA-AD-6963 | C1      |
| TCGA-AD-6964 | C1      |
| TCGA-AY-6196 | C1      |
| TCGA-AZ-6607 | C1      |
| TCGA-CA-6718 | C1      |
| TCGA-CK-5914 | C1      |
| TCGA-D5-5540 | C1      |
| TCGA-D5-5541 | C1      |
| TCGA-D5-6536 | C1      |
| TCGA-D5-6540 | C1      |
| TCGA-D5-6923 | C1      |
| TCGA-D5-6924 | C1      |
| TCGA-D5-6926 | C1      |
| TCGA-D5-6927 | C1      |
| TCGA-D5-6928 | C1      |
| TCGA-D5-6932 | C1      |
| TCGA-F4-6703 | C1      |
| TCGA-G4-6628 | C1      |
| TCGA-NH-A50V | C1      |
| TCGA-WS-AB45 | C1      |
| TCGA-3L-AA1B | C2      |
| TCGA-4N-A93T | C2      |
| TCGA-4T-AA8H | C2      |
| TCGA-A6-5656 | C2      |
| TCGA-A6-5659 | C2      |
| TCGA-A6-5660 | C2      |
| TCGA-A6-5662 | C2      |
| TCGA-A6-5666 | C2      |
| TCGA-A6-6141 | C2      |
| TCGA-A6-6648 | C2      |
| TCGA-A6-6650 | C2      |
| TCGA-A6-6652 | C2      |
| TCGA-A6-A567 | C2      |
| TCGA-A6-A56B | C2      |
| TCGA-A6-A5ZU | C2      |
| TCGA-AA-3502 | C2      |
| TCGA-AA-A01X | C2      |
| TCGA-AA-A02K | C2      |
| TCGA-AD-6965 | C2      |
| TCGA-AD-A5EK | C2      |

|              |    |
|--------------|----|
| TCGA-AM-5820 | C2 |
| TCGA-AY-A54L | C2 |
| TCGA-AY-A71X | C2 |
| TCGA-AZ-4313 | C2 |
| TCGA-AZ-4323 | C2 |
| TCGA-AZ-5407 | C2 |
| TCGA-AZ-6599 | C2 |
| TCGA-AZ-6608 | C2 |
| TCGA-CA-5796 | C2 |
| TCGA-CA-5797 | C2 |
| TCGA-CA-6715 | C2 |
| TCGA-CA-6716 | C2 |
| TCGA-CK-5912 | C2 |
| TCGA-CK-5915 | C2 |
| TCGA-CM-4747 | C2 |
| TCGA-CM-5862 | C2 |
| TCGA-CM-5864 | C2 |
| TCGA-CM-5868 | C2 |
| TCGA-CM-6165 | C2 |
| TCGA-CM-6166 | C2 |
| TCGA-CM-6676 | C2 |
| TCGA-CM-6678 | C2 |
| TCGA-CM-6679 | C2 |
| TCGA-D5-5537 | C2 |
| TCGA-D5-6532 | C2 |
| TCGA-D5-6538 | C2 |
| TCGA-D5-6539 | C2 |
| TCGA-D5-6922 | C2 |
| TCGA-D5-6929 | C2 |
| TCGA-DM-A0X9 | C2 |
| TCGA-DM-A0XF | C2 |
| TCGA-DM-A1D0 | C2 |
| TCGA-DM-A1D4 | C2 |
| TCGA-DM-A1D6 | C2 |
| TCGA-DM-A1D7 | C2 |
| TCGA-DM-A1D8 | C2 |
| TCGA-DM-A1D9 | C2 |
| TCGA-DM-A1DB | C2 |
| TCGA-DM-A1HA | C2 |
| TCGA-DM-A282 | C2 |
| TCGA-DM-A285 | C2 |
| TCGA-DM-A288 | C2 |
| TCGA-DM-A28A | C2 |
| TCGA-DM-A28C | C2 |
| TCGA-DM-A28E | C2 |
| TCGA-DM-A28F | C2 |
| TCGA-DM-A28G | C2 |
| TCGA-DM-A28H | C2 |

|              |    |
|--------------|----|
| TCGA-DM-A28K | C2 |
| TCGA-DM-A28M | C2 |
| TCGA-F4-6461 | C2 |
| TCGA-F4-6463 | C2 |
| TCGA-F4-6704 | C2 |
| TCGA-F4-6808 | C2 |
| TCGA-G4-6294 | C2 |
| TCGA-G4-6298 | C2 |
| TCGA-G4-6299 | C2 |
| TCGA-G4-6307 | C2 |
| TCGA-G4-6310 | C2 |
| TCGA-G4-6315 | C2 |
| TCGA-G4-6317 | C2 |
| TCGA-G4-6322 | C2 |
| TCGA-G4-6323 | C2 |
| TCGA-G4-6626 | C2 |
| TCGA-NH-A50U | C2 |
| TCGA-NH-A8F7 | C2 |
| TCGA-NH-A8F8 | C2 |
| TCGA-QG-A5YX | C2 |
| TCGA-QG-A5Z1 | C2 |
| TCGA-RU-A8FL | C2 |
| TCGA-A6-2686 | C3 |
| TCGA-A6-6780 | C3 |
| TCGA-AA-3526 | C3 |
| TCGA-AA-3655 | C3 |
| TCGA-AA-A01P | C3 |
| TCGA-AD-5900 | C3 |
| TCGA-AD-6889 | C3 |
| TCGA-AD-6895 | C3 |
| TCGA-AD-A5EJ | C3 |
| TCGA-AM-5821 | C3 |
| TCGA-AU-6004 | C3 |
| TCGA-AZ-4615 | C3 |
| TCGA-AZ-6598 | C3 |
| TCGA-CK-4951 | C3 |
| TCGA-CK-4952 | C3 |
| TCGA-CK-5913 | C3 |
| TCGA-CK-5916 | C3 |
| TCGA-CK-6746 | C3 |
| TCGA-CM-4743 | C3 |
| TCGA-CM-5861 | C3 |
| TCGA-CM-6171 | C3 |
| TCGA-CM-6674 | C3 |
| TCGA-CM-6675 | C3 |
| TCGA-D5-6530 | C3 |
| TCGA-D5-6531 | C3 |
| TCGA-D5-6541 | C3 |

|              |    |
|--------------|----|
| TCGA-D5-6930 | C3 |
| TCGA-DM-A1HB | C3 |
| TCGA-F4-6570 | C3 |
| TCGA-F4-6856 | C3 |
| TCGA-G4-6588 | C3 |
| TCGA-A6-2675 | C4 |
| TCGA-A6-2682 | C4 |
| TCGA-A6-2684 | C4 |
| TCGA-A6-2685 | C4 |
| TCGA-A6-4105 | C4 |
| TCGA-A6-5657 | C4 |
| TCGA-A6-5661 | C4 |
| TCGA-A6-5665 | C4 |
| TCGA-A6-5667 | C4 |
| TCGA-A6-6137 | C4 |
| TCGA-A6-6140 | C4 |
| TCGA-A6-6142 | C4 |
| TCGA-A6-6649 | C4 |
| TCGA-A6-6651 | C4 |
| TCGA-A6-6653 | C4 |
| TCGA-A6-6654 | C4 |
| TCGA-A6-A565 | C4 |
| TCGA-A6-A566 | C4 |
| TCGA-AA-3492 | C4 |
| TCGA-AA-3495 | C4 |
| TCGA-AA-3496 | C4 |
| TCGA-AA-3506 | C4 |
| TCGA-AA-3509 | C4 |
| TCGA-AA-3511 | C4 |
| TCGA-AA-3660 | C4 |
| TCGA-AA-3662 | C4 |
| TCGA-AA-3663 | C4 |
| TCGA-AA-3675 | C4 |
| TCGA-AA-3685 | C4 |
| TCGA-AA-3697 | C4 |
| TCGA-AA-3712 | C4 |
| TCGA-AA-3713 | C4 |
| TCGA-AA-A01Z | C4 |
| TCGA-AA-A02Y | C4 |
| TCGA-AD-6548 | C4 |
| TCGA-AD-6888 | C4 |
| TCGA-AD-6890 | C4 |
| TCGA-AD-6899 | C4 |
| TCGA-AU-3779 | C4 |
| TCGA-AY-5543 | C4 |
| TCGA-AY-6197 | C4 |
| TCGA-AY-6386 | C4 |
| TCGA-AY-A69D | C4 |

|              |    |
|--------------|----|
| TCGA-AY-A8YK | C4 |
| TCGA-AZ-4315 | C4 |
| TCGA-AZ-4614 | C4 |
| TCGA-AZ-4616 | C4 |
| TCGA-AZ-4682 | C4 |
| TCGA-AZ-4684 | C4 |
| TCGA-AZ-5403 | C4 |
| TCGA-AZ-6600 | C4 |
| TCGA-AZ-6601 | C4 |
| TCGA-AZ-6603 | C4 |
| TCGA-AZ-6605 | C4 |
| TCGA-AZ-6606 | C4 |
| TCGA-CA-5254 | C4 |
| TCGA-CA-5255 | C4 |
| TCGA-CA-5256 | C4 |
| TCGA-CA-6717 | C4 |
| TCGA-CA-6719 | C4 |
| TCGA-CK-4947 | C4 |
| TCGA-CK-4948 | C4 |
| TCGA-CK-4950 | C4 |
| TCGA-CK-6747 | C4 |
| TCGA-CK-6748 | C4 |
| TCGA-CK-6751 | C4 |
| TCGA-CM-4744 | C4 |
| TCGA-CM-4751 | C4 |
| TCGA-CM-5344 | C4 |
| TCGA-CM-5348 | C4 |
| TCGA-CM-5349 | C4 |
| TCGA-CM-5860 | C4 |
| TCGA-CM-5863 | C4 |
| TCGA-CM-6161 | C4 |
| TCGA-CM-6162 | C4 |
| TCGA-CM-6163 | C4 |
| TCGA-CM-6164 | C4 |
| TCGA-CM-6167 | C4 |
| TCGA-CM-6168 | C4 |
| TCGA-CM-6169 | C4 |
| TCGA-CM-6170 | C4 |
| TCGA-CM-6172 | C4 |
| TCGA-CM-6677 | C4 |
| TCGA-CM-6680 | C4 |
| TCGA-D5-5538 | C4 |
| TCGA-D5-5539 | C4 |
| TCGA-D5-6529 | C4 |
| TCGA-D5-6533 | C4 |
| TCGA-D5-6534 | C4 |
| TCGA-D5-6535 | C4 |
| TCGA-D5-6537 | C4 |

|              |    |
|--------------|----|
| TCGA-D5-6898 | C4 |
| TCGA-D5-6920 | C4 |
| TCGA-D5-6931 | C4 |
| TCGA-D5-7000 | C4 |
| TCGA-DM-A0XD | C4 |
| TCGA-DM-A1DA | C4 |
| TCGA-DM-A280 | C4 |
| TCGA-F4-6459 | C4 |
| TCGA-F4-6460 | C4 |
| TCGA-F4-6569 | C4 |
| TCGA-F4-6805 | C4 |
| TCGA-F4-6806 | C4 |
| TCGA-F4-6807 | C4 |
| TCGA-F4-6809 | C4 |
| TCGA-F4-6854 | C4 |
| TCGA-F4-6855 | C4 |
| TCGA-G4-6293 | C4 |
| TCGA-G4-6295 | C4 |
| TCGA-G4-6297 | C4 |
| TCGA-G4-6302 | C4 |
| TCGA-G4-6303 | C4 |
| TCGA-G4-6304 | C4 |
| TCGA-G4-6306 | C4 |
| TCGA-G4-6309 | C4 |
| TCGA-G4-6311 | C4 |
| TCGA-G4-6314 | C4 |
| TCGA-G4-6320 | C4 |
| TCGA-G4-6321 | C4 |
| TCGA-G4-6586 | C4 |
| TCGA-G4-6625 | C4 |
| TCGA-G4-6627 | C4 |
| TCGA-NH-A50T | C4 |
| TCGA-NH-A5IV | C4 |
| TCGA-NH-A6GA | C4 |
| TCGA-NH-A6GB | C4 |
| TCGA-NH-A6GC | C4 |
| TCGA-QG-A5YV | C4 |
| TCGA-QG-A5YW | C4 |
| TCGA-QG-A5Z2 | C4 |
| TCGA-QL-A97D | C4 |

**Supplementary Table 4 - Gene Overlaps among Signatures**

|                           | Inflammatory<br>127-gene | Chen/Scurrah<br>Metaplasia | Chen/Scurrah<br>Wnt.StemCell | Leach<br>BA.down | Leach<br>BA | Leach<br>BA.up | Leach<br>WA |
|---------------------------|--------------------------|----------------------------|------------------------------|------------------|-------------|----------------|-------------|
| Inflammatory 127          | 127                      |                            |                              |                  |             |                |             |
| Chen/Scurrah Metaplasia   | 1                        | 18                         |                              |                  |             |                |             |
| Chen/Scurrah Wnt.StemCell | 0                        | 0                          | 11                           |                  |             |                |             |
| Leach.BA.down             | 0                        | 0                          | 0                            | 22               |             |                |             |
| Leach.BA                  | 2                        | 1                          | 0                            | 22               | 56          |                |             |
| Leach.BA.up               | 2                        | 1                          | 0                            | 0                | 34          | 34             |             |
| Leach.WA                  | 0                        | 0                          | 2                            | 0                | 1           | 1              | 8           |

**Supplementary Table 5 - Number of focal CNVs (gains or losses <10Mb)**

|               | C2          | C4          | ratio       | 95%CI                  | P-val         |
|---------------|-------------|-------------|-------------|------------------------|---------------|
| <b>global</b> | <b>4.19</b> | <b>3.65</b> | <b>1.15</b> | <b>( 1.11 - 1.18 )</b> | <b>0.0000</b> |
| chr           |             |             |             |                        |               |
| 1             | 6.31        | 4.98        | 1.27        | ( 1.13 - 1.42 )        | 0.0000        |
| 2             | 5.63        | 4.34        | 1.30        | ( 1.15 - 1.47 )        | 0.0000        |
| 3             | 3.97        | 3.96        | 1.00        | ( 0.87 - 1.15 )        | 0.9833        |
| 4             | 5.63        | 5.28        | 1.07        | ( 0.95 - 1.20 )        | 0.2720        |
| 5             | 4.30        | 4.77        | 0.90        | ( 0.79 - 1.02 )        | 0.1079        |
| 6             | 4.39        | 5.99        | 0.73        | ( 0.65 - 0.83 )        | 0.0000        |
| 7             | 3.51        | 3.53        | 0.99        | ( 0.86 - 1.15 )        | 0.9378        |
| 8             | 7.77        | 6.62        | 1.17        | ( 1.06 - 1.30 )        | 0.0017        |
| 9             | 2.88        | 2.41        | 1.19        | ( 1.01 - 1.41 )        | 0.0370        |
| 10            | 5.10        | 4.77        | 1.07        | ( 0.95 - 1.21 )        | 0.2840        |
| 11            | 3.53        | 3.19        | 1.11        | ( 0.96 - 1.28 )        | 0.1685        |
| 12            | 3.83        | 3.51        | 1.09        | ( 0.95 - 1.26 )        | 0.2152        |
| 13            | 4.78        | 2.86        | 1.67        | ( 1.45 - 1.92 )        | 0.0000        |
| 14            | 2.69        | 2.38        | 1.13        | ( 0.96 - 1.34 )        | 0.1496        |
| 15            | 3.12        | 1.97        | 1.59        | ( 1.34 - 1.88 )        | 0.0000        |
| 16            | 3.59        | 3.94        | 0.91        | ( 0.79 - 1.05 )        | 0.1934        |
| 17            | 3.98        | 3.63        | 1.10        | ( 0.96 - 1.26 )        | 0.1868        |
| 18            | 4.61        | 2.85        | 1.62        | ( 1.40 - 1.86 )        | 0.0000        |
| 19            | 1.98        | 1.58        | 1.25        | ( 1.02 - 1.53 )        | 0.0281        |
| 20            | 6.91        | 4.83        | 1.43        | ( 1.28 - 1.60 )        | 0.0000        |
| 21            | 1.84        | 2.03        | 0.91        | ( 0.75 - 1.10 )        | 0.3315        |
| 22            | 2.37        | 1.20        | 1.97        | ( 1.60 - 2.42 )        | 0.0000        |
| 23            | 3.59        | 3.41        | 1.05        | ( 0.91 - 1.21 )        | 0.4961        |

**Number of focal gains (<10Mb)**

|               | C2          | C4          | ratio       | 95%CI                  | P-val         |
|---------------|-------------|-------------|-------------|------------------------|---------------|
| <b>global</b> | <b>1.47</b> | <b>1.06</b> | <b>1.38</b> | <b>( 1.31 - 1.45 )</b> | <b>0.0000</b> |
| chr           |             |             |             |                        |               |
| 1             | 1.89        | 1.13        | 1.67        | ( 1.34 - 2.08 )        | 0.0000        |
| 2             | 1.38        | 0.81        | 1.70        | ( 1.31 - 2.20 )        | 0.0001        |
| 3             | 0.92        | 0.81        | 1.14        | ( 0.85 - 1.51 )        | 0.3894        |
| 4             | 1.60        | 1.14        | 1.40        | ( 1.11 - 1.77 )        | 0.0040        |
| 5             | 1.00        | 1.10        | 0.91        | ( 0.70 - 1.18 )        | 0.4734        |
| 6             | 1.32        | 1.70        | 0.78        | ( 0.62 - 0.97 )        | 0.0263        |
| 7             | 1.57        | 1.19        | 1.32        | ( 1.05 - 1.66 )        | 0.0178        |
| 8             | 3.11        | 3.08        | 1.01        | ( 0.87 - 1.18 )        | 0.8915        |
| 9             | 1.04        | 0.45        | 2.30        | ( 1.66 - 3.20 )        | 0.0000        |



|    |      |      |      |                 |        |
|----|------|------|------|-----------------|--------|
| 10 | 1.50 | 1.24 | 1.21 | ( 0.96 - 1.52 ) | 0.1071 |
| 11 | 1.38 | 0.84 | 1.63 | ( 1.26 - 2.11 ) | 0.0002 |
| 12 | 1.46 | 1.08 | 1.35 | ( 1.06 - 1.71 ) | 0.0139 |
| 13 | 2.98 | 1.17 | 2.54 | ( 2.08 - 3.10 ) | 0.0000 |
| 14 | 0.39 | 0.48 | 0.80 | ( 0.53 - 1.22 ) | 0.2990 |
| 15 | 0.63 | 0.32 | 1.98 | ( 1.32 - 2.95 ) | 0.0009 |
| 16 | 1.27 | 1.16 | 1.10 | ( 0.86 - 1.40 ) | 0.4642 |
| 17 | 1.68 | 1.23 | 1.36 | ( 1.09 - 1.70 ) | 0.0070 |
| 18 | 1.01 | 0.35 | 2.88 | ( 2.01 - 4.11 ) | 0.0000 |
| 19 | 0.81 | 0.52 | 1.57 | ( 1.13 - 2.19 ) | 0.0076 |
| 20 | 4.44 | 2.99 | 1.49 | ( 1.29 - 1.71 ) | 0.0000 |
| 21 | 0.50 | 0.39 | 1.28 | ( 0.86 - 1.91 ) | 0.2296 |
| 22 | 0.73 | 0.16 | 4.69 | ( 2.85 - 7.74 ) | 0.0000 |
| 23 | 1.12 | 1.13 | 1.00 | ( 0.77 - 1.29 ) | 0.9848 |

Number of focal losses (<10Mb)

|               | C2          | C4          | ratio       | 95%CI                  | P-val         |
|---------------|-------------|-------------|-------------|------------------------|---------------|
| <b>global</b> | <b>2.72</b> | <b>2.59</b> | <b>1.05</b> | <b>( 1.02 - 1.09 )</b> | <b>0.0047</b> |
| chr           |             |             |             |                        |               |
| 1             | 4.42        | 3.85        | 1.15        | ( 1.01 - 1.31 )        | 0.0403        |
| 2             | 4.26        | 3.52        | 1.21        | ( 1.05 - 1.38 )        | 0.0066        |
| 3             | 3.04        | 3.15        | 0.97        | ( 0.83 - 1.13 )        | 0.6680        |
| 4             | 4.03        | 4.14        | 0.97        | ( 0.85 - 1.11 )        | 0.7000        |
| 5             | 3.30        | 3.67        | 0.90        | ( 0.78 - 1.04 )        | 0.1497        |
| 6             | 3.07        | 4.29        | 0.71        | ( 0.62 - 0.83 )        | 0.0000        |
| 7             | 1.94        | 2.34        | 0.83        | ( 0.69 - 1.00 )        | 0.0496        |
| 8             | 4.66        | 3.54        | 1.32        | ( 1.15 - 1.50 )        | 0.0001        |
| 9             | 1.83        | 1.96        | 0.93        | ( 0.77 - 1.14 )        | 0.5020        |
| 10            | 3.60        | 3.53        | 1.02        | ( 0.88 - 1.18 )        | 0.7911        |
| 11            | 2.16        | 2.34        | 0.92        | ( 0.77 - 1.10 )        | 0.3636        |
| 12            | 2.38        | 2.43        | 0.98        | ( 0.82 - 1.16 )        | 0.8079        |
| 13            | 1.80        | 1.69        | 1.07        | ( 0.87 - 1.31 )        | 0.5346        |
| 14            | 2.30        | 1.89        | 1.22        | ( 1.01 - 1.46 )        | 0.0384        |
| 15            | 2.49        | 1.65        | 1.51        | ( 1.25 - 1.82 )        | 0.0000        |
| 16            | 2.32        | 2.78        | 0.83        | ( 0.70 - 0.99 )        | 0.0385        |
| 17            | 2.30        | 2.39        | 0.96        | ( 0.81 - 1.15 )        | 0.6676        |
| 18            | 3.60        | 2.50        | 1.44        | ( 1.23 - 1.68 )        | 0.0000        |
| 19            | 1.17        | 1.06        | 1.10        | ( 0.85 - 1.42 )        | 0.4716        |
| 20            | 2.47        | 1.84        | 1.34        | ( 1.12 - 1.61 )        | 0.0016        |
| 21            | 1.34        | 1.64        | 0.82        | ( 0.66 - 1.02 )        | 0.0811        |
| 22            | 1.63        | 1.05        | 1.56        | ( 1.23 - 1.97 )        | 0.0002        |
| 23            | 2.47        | 2.29        | 1.08        | ( 0.91 - 1.28 )        | 0.4010        |
